# Supplementary material for: Collismycin C from the Micronesian Marine Bacterium Streptomyces sp. MC025 Inhibits Staphylococcus aureus Biofilm Formation
Source: PubMed Central journal article supplement (PMC5742847; doi:10.3390/md15120387), 2017-12-12
Supplement: marinedrugs-15-00387-s001.pdf [file marinedrugs-15-00387-s001.pdf]

*Supplementary Materials*

# **Collismycin C from the Micronesian Marine Bacterium *Streptomyces* sp. MC025 Inhibits *Staphylococcus aureus* Biofilm Formation**

**Jin-Hyung Lee <sup>1,†</sup>, Eonmi Kim <sup>2,†</sup>, Hyukjae Choi <sup>2,\*</sup> and Jintae Lee <sup>1,\*</sup>**

<sup>1</sup> School of Chemical Engineering, Yeungnam University, Gyeongsan-si, Gyeongsangbukdo 38541, Korea; [jinhlee@ynu.ac.kr](mailto:jinhlee@ynu.ac.kr) (J.H.L.)

<sup>2</sup> College of Pharmacy, Yeungnam University, Gyeongsan-si, Gyeongsangbukdo 38541, Korea; [minnie60@hanmail.net](mailto:minnie60@hanmail.net) (E.K.)

\* Correspondence: [h5choi@yu.ac.kr](mailto:h5choi@yu.ac.kr) (H.C.); [jilee@ynu.ac.kr](mailto:jilee@ynu.ac.kr) (J. L.); Tel.: +82-53-810-2824 (H.C.); +82-53-810-2533

† These authors equally contributed to this work.

## Table of Contents

|                                                                                                                                                | Page  |
|------------------------------------------------------------------------------------------------------------------------------------------------|-------|
| <b>Table S1.</b> List of 79 bacterial strains isolated from marine organisms collected in the waters of Kosrae, Federated States of Micronesia | 3 – 5 |
| <b>Table S2.</b> <sup>1</sup> H and <sup>13</sup> C NMR (250 and 63 MHz, respectively; CDCl <sub>3</sub> ) data of <b>1-6</b>                  | 6     |
| <b>Figure S1.</b> Antibiofilm activity screening of the extracts of 79 bacterial culture broth                                                 | 7     |
| <b>Figure S2.</b> Plate image of <i>Streptomyces</i> sp. MC025                                                                                 | 8     |
| <b>Figure S3.</b> <sup>1</sup> H NMR spectrum of compound <b>1</b> (CDCl <sub>3</sub> , 250 MHz)                                               | 9     |
| <b>Figure S4.</b> <sup>13</sup> C NMR spectrum of compound <b>1</b> (CDCl <sub>3</sub> , 63 MHz)                                               | 10    |
| <b>Figure S5.</b> <sup>1</sup> H NMR spectrum of compound <b>2</b> (CDCl <sub>3</sub> , 250 MHz)                                               | 11    |
| <b>Figure S6.</b> <sup>13</sup> C NMR spectrum of compound <b>2</b> (CDCl <sub>3</sub> , 63 MHz)                                               | 12    |
| <b>Figure S7.</b> <sup>1</sup> H NMR spectrum of compound <b>3</b> (CDCl <sub>3</sub> , 250 MHz)                                               | 13    |
| <b>Figure S8.</b> <sup>13</sup> C NMR spectrum of compound <b>3</b> (CDCl <sub>3</sub> , 63 MHz)                                               | 14    |
| <b>Figure S9.</b> <sup>1</sup> H NMR spectrum of compound <b>4</b> (CDCl <sub>3</sub> , 250 MHz)                                               | 15    |
| <b>Figure S10.</b> <sup>13</sup> C NMR spectrum of compound <b>4</b> (CDCl <sub>3</sub> , 63 MHz)                                              | 16    |
| <b>Figure S11.</b> <sup>1</sup> H NMR spectrum of compound <b>5</b> (CDCl <sub>3</sub> , 250 MHz)                                              | 17    |
| <b>Figure S12.</b> <sup>13</sup> C NMR spectrum of compound <b>5</b> (CDCl <sub>3</sub> , 63 MHz)                                              | 18    |
| <b>Figure S13.</b> <sup>1</sup> H NMR spectrum of compound <b>6</b> (CDCl <sub>3</sub> , 250 MHz)                                              | 19    |
| <b>Figure S14.</b> <sup>13</sup> C NMR spectrum of compound <b>6</b> (CDCl <sub>3</sub> , 63 MHz)                                              | 20    |

**Table S1.** List of 79 bacterial strains isolated from marine organisms collected in the waters of Kosrae, Federated States of Micronesia

| Strain | Phylum         | Class                    | Blast Top                                          | Similarity  | sequence length |
|--------|----------------|--------------------------|----------------------------------------------------|-------------|-----------------|
| MC001  | Proteobacteria | $\gamma$ -Proteobacteria | Photobacterium ganghwense strain FR1311            | 99.43780745 | 1415/1423       |
| MC006  | Proteobacteria | $\gamma$ -Proteobacteria | Alteromonas macleodii str. 'Balearic Sea AD45'     | 99.85041137 | 1335/1337       |
| MC007  | Firmicutes     | Bacilli                  | Bacillus aryabhatai strain B8W22                   | 99.92952784 | 1418/1419       |
| MC008  | Proteobacteria | $\gamma$ -Proteobacteria | Vibrio maritimus strain R-40493                    | 98.64864865 | 1387/1406       |
| MC009  | Proteobacteria | $\gamma$ -Proteobacteria | Vibrio owensii strain DY05                         | 99.85559567 | 1383/1385       |
| MC010  | Actinobacteria | Actinobacteria           | Nocardioides furvisabuli strain SBS-26             | 99.40784604 | 1343/1351       |
| MC011  | Actinobacteria | Actinobacteria           | Rhodococcus ruber strain DSM 43338                 | 99.06069364 | 1371/1384       |
| MC012  | Bacteroidetes  | Flavobacteria            | Aquimarina spongiae strain A6                      | 98.93162393 | 1389/1404       |
| MC015  | Firmicutes     | Bacilli                  | Staphylococcus saprophyticus strain ATCC 15305     | 99.92810927 | 1390/1391       |
| MC016  | Proteobacteria | $\alpha$ -Proteobacteria | Pseudovibrio sp. FO-BEG1 strain FO-BEG1            | 98.44329133 | 1328/1349       |
| MC020  | Actinobacteria | Actinobacteria           | Kocuria marina strain KMM 3905                     | 99.71305595 | 1390/1394       |
| MC022  | Proteobacteria | $\alpha$ -Proteobacteria | Loktanella soesokkakensis strain DSSK1-5           | 99.92779783 | 1384/1385       |
| MC023  | Proteobacteria | $\gamma$ -Proteobacteria | Alteromonas macleodii str. 'Balearic Sea AD45'     | 99.85663082 | 1393/1395       |
| MC024  | Actinobacteria | Actinobacteria           | Micrococcus yunnanensis strain YIM 65004           | 99.70760234 | 1364/1368       |
| MC025  | Actinobacteria | Actinobacteria           | Streptomyces parvus strain NBRC 14599              | 99.8540146  | 1368/1370       |
| MC026  | Actinobacteria | Actinobacteria           | Brachybacterium paraconglomeratum strain LMG 19861 | 100         | 1382/1382       |
| MC028  | Proteobacteria | $\gamma$ -Proteobacteria | Ferrimonas futtsuensis strain FUT3661              | 99.12600146 | 1361/1373       |
| MC030  | Firmicutes     | Bacilli                  | Staphylococcus arlettae strain ATCC 43957          | 100         | 1392/1392       |
| MC031  | Firmicutes     | Bacilli                  | Bacillus megaterium strain NBRC 15308              | 100         | 1416/1416       |
| MC033  | Firmicutes     | Bacilli                  | Bacillus toyonensis strain BCT-7112                | 99.85925405 | 1419/1421       |
| MC034  | Proteobacteria | $\alpha$ -Proteobacteria | Loktanella pyoseonensis strain JJM85               | 99.16981132 | 1314/1325       |
| MC035  | Proteobacteria | $\gamma$ -Proteobacteria | Pseudomonas brenneri strain CFML 97-391            | 99.56865564 | 1385/1391       |
| MC036  | Firmicutes     | Bacilli                  | Planomicrobium okeanokoites strain NBRC 12536      | 99.85347985 | 1363/1365       |
| MC037  | Proteobacteria | $\gamma$ -Proteobacteria | Alteromonas macleodii strain NBRC 102226           | 98.5        | 1379/1400       |
| MC038  | Firmicutes     | Bacilli                  | Bacillus aryabhatai strain B8W22                   | 100         | 1416/1416       |
| MC041  | Actinobacteria | Actinobacteria           | Agrococcus terreus strain DNG5                     | 99.70887918 | 1370/1374       |
| MC042  | Firmicutes     | Bacilli                  | Fictibacillus phosphorivorans strain Ca7           | 100         | 1340/1340       |
| MC047  | Actinobacteria | Actinobacteria           | Streptomyces albolongus strain NBRC 13465          | 99.27588704 | 1371/1381       |
| MC051  | Actinobacteria | Actinobacteria           | Pseudonocardia kongjuensis strain LM 157           | 98.85386819 | 1380/1396       |
| MC053  | Actinobacteria | Actinobacteria           | Pseudonocardia antitumoralis strain SCSIO 01299    | 99.78601997 | 1399/1402       |

|       |                |                          |                                                     |             |           |
|-------|----------------|--------------------------|-----------------------------------------------------|-------------|-----------|
| MC054 | Proteobacteria | $\gamma$ -Proteobacteria | <i>Vibrio furnissii</i> strain 9119-82              | 99.71448965 | 1397/1401 |
| MC055 | Proteobacteria | $\gamma$ -Proteobacteria | <i>Microbulbifer variabilis</i> strain Ni-2088      | 99.12727273 | 1363/1375 |
| MC056 | Proteobacteria | $\gamma$ -Proteobacteria | <i>Pseudoalteromonas shioyasakiensis</i> strain SE3 | 99.2074928  | 1377/1388 |
| MC058 | Proteobacteria | $\gamma$ -Proteobacteria | <i>Photobacterium ganghwense</i> strain FR1311      | 99.20692141 | 1376/1387 |
| MC061 | Actinobacteria | Actinobacteria           | <i>Agrococcus terreus</i> strain DNG5               | 99.49640288 | 1383/1390 |
| MC062 | Actinobacteria | Actinobacteria           | <i>Agrococcus terreus</i> strain DNG5               | 99.78229318 | 1375/1378 |
| MC063 | Actinobacteria | Actinobacteria           | <i>Microbacterium neimengense</i> strain 7087       | 98.61516035 | 1353/1372 |
| MC066 | Actinobacteria | Actinobacteria           | <i>Microbacterium aquimaris</i> strain JS54-2       | 99.19531822 | 1356/1367 |
| MC067 | Firmicutes     | Bacilli                  | <i>Staphylococcus gallinarum</i> strain VIII1       | 100         | 1307/1307 |
| MC068 | Actinobacteria | Actinobacteria           | <i>Micrococcus yunnanensis</i> strain YIM 65004     | 99.9271137  | 1371/1372 |
| MC070 | Firmicutes     | Bacilli                  | <i>Staphylococcus capitis</i> strain JCM 2420       | 99.85611511 | 1388/1390 |
| MC072 | Proteobacteria | $\gamma$ -Proteobacteria | <i>Photobacterium rosenbergii</i> strain CC1        | 99.57050823 | 1391/1397 |
| MC073 | Proteobacteria | $\alpha$ -Proteobacteria | <i>Paracoccus zeaxanthinifaciens</i> strain R-1506  | 99.78479197 | 1391/1394 |
| MC074 | Firmicutes     | Bacilli                  | <i>Bacillus cibi</i> strain JG-30                   | 99.92790195 | 1386/1387 |
| MC075 | Proteobacteria | $\gamma$ -Proteobacteria | <i>Pseudoalteromonas shioyasakiensis</i> strain SE3 | 99.56521739 | 1374/1380 |
| MC076 | Proteobacteria | $\alpha$ -Proteobacteria | <i>Yangia pacifica</i> strain DX5-10                | 98.70722433 | 1298/1315 |
| MC077 | Proteobacteria | $\alpha$ -Proteobacteria | <i>Pseudovibrio</i> sp. FO-BEG1 strain FO-BEG1      | 99.92581602 | 1347/1348 |
| MC078 | Proteobacteria | $\gamma$ -Proteobacteria | <i>Pseudoalteromonas shioyasakiensis</i> strain SE3 | 99.42028986 | 1372/1380 |
| MC081 | Actinobacteria | Actinobacteria           | <i>Streptomyces globisporus</i> strain KCTC 9026    | 100         | 1312/1312 |
| MC082 | Firmicutes     | Bacilli                  | <i>Bacillus cereus</i> ATCC 14579                   | 100         | 1403/1403 |
| MC085 | Bacteroidetes  | Flavobacteria            | <i>Aquimarina salinaria</i> strain antisso-27       | 98.31994156 | 1346/1369 |
| MC086 | Proteobacteria | $\alpha$ -Proteobacteria | <i>Loktanella soesokkakensis</i> strain DSSK1-5     | 99.8470948  | 1306/1308 |
| MC090 | Proteobacteria | $\gamma$ -Proteobacteria | <i>Photobacterium ganghwense</i> strain FR1311      | 99.64739069 | 1413/1418 |
| MC091 | Proteobacteria | $\alpha$ -Proteobacteria | <i>Loktanella soesokkakensis</i> strain DSSK1-5     | 99.92779783 | 1384/1385 |
| MC093 | Firmicutes     | Bacilli                  | <i>Bacillus infantis</i>                            | 99.71771348 | 1413/1417 |
| MC094 | Proteobacteria | $\gamma$ -Proteobacteria | <i>Shewanella haliotis</i> strain DW01              | 99.85663082 | 1393/1395 |
| MC097 | Firmicutes     | Bacilli                  | <i>Bacillus aquimaris</i> strain TF-12              | 98.9154013  | 1368/1383 |
| MC099 | Firmicutes     | Bacilli                  | <i>Staphylococcus arlettae</i> strain ATCC 43957    | 99.85326486 | 1361/1363 |
| MC100 | Proteobacteria | $\gamma$ -Proteobacteria | <i>Vibrio alginolyticus</i> strain NBRC 15630       | 99.85559567 | 1383/1385 |
| MC101 | Actinobacteria | Actinobacteria           | <i>Nocardiopsis prasina</i> strain DSM 43845        | 99.77186312 | 1312/1315 |
| MC102 | Proteobacteria | $\gamma$ -Proteobacteria | <i>Vibrio alginolyticus</i> strain NBRC 15630       | 99.92857143 | 1399/1400 |
| MC103 | Actinobacteria | Actinobacteria           | <i>Jiangella muralis</i> strain 15-Je-017           | 98.34462002 | 1307/1329 |

|       |                |                          |                                                      |             |           |
|-------|----------------|--------------------------|------------------------------------------------------|-------------|-----------|
| MC104 | Firmicutes     | Bacilli                  | Bacillus endophyticus strain 2DT                     | 99.55156951 | 1332/1338 |
| MC106 | Actinobacteria | Actinobacteria           | Streptomyces coelicoflavus strain NBRC 15399         | 100         | 1378/1378 |
| MC107 | Firmicutes     | Bacilli                  | Bacillus infantis                                    | 99.85724483 | 1399/1401 |
| MC109 | Firmicutes     | Bacilli                  | Bacillus cereus ATCC 14579                           | 99.85905567 | 1417/1419 |
| MC111 | Proteobacteria | $\gamma$ -Proteobacteria | Alteromonas macleodii str. 'Balearic Sea AD45'       | 99.92679356 | 1365/1366 |
| MC112 | Firmicutes     | Bacilli                  | Bacillus oceanisediminis strain H2                   | 99.63924964 | 1381/1386 |
| MC115 | Firmicutes     | Bacilli                  | Fictibacillus barbaricus strain V2-BIII-A2           | 99.3598862  | 1397/1406 |
| MC116 | Proteobacteria | $\alpha$ -Proteobacteria | Paracoccus zeaxanthinifaciens strain R-1506          | 99.85590778 | 1386/1388 |
| MC117 | Proteobacteria | $\gamma$ -Proteobacteria | Pseudovibrio sp. FO-BEG1 strain FO-BEG1              | 100         | 1342/1342 |
| MC119 | Actinobacteria | Actinobacteria           | Kocuria palustris strain TAGA27                      | 100         | 1370/1370 |
| MC120 | Actinobacteria | Actinobacteria           | Agromyces indicus strain NIO-1018                    | 99.77810651 | 1349/1352 |
| MC121 | Actinobacteria | Actinobacteria           | Micrococcus sp. MOLA 4                               | 99.93127148 | 1454/1455 |
| MC122 | Proteobacteria | $\gamma$ -Proteobacteria | Pseudoalteromonas shioyasakiensis strain SE3         | 99.70695971 | 1361/1365 |
| MC125 | Firmicutes     | Bacilli                  | Bacillus subtilis subsp. spizizenii strain ATCC 6633 | 100         | 1400/1400 |
| MC127 | Firmicutes     | Bacilli                  | Bacillus aerius strain 24K                           | 100         | 1400/1400 |
| MC129 | Actinobacteria | Actinobacteria           | Rhodococcus equi strain DSM 20307                    | 100         | 1360/1360 |
| MC130 | Actinobacteria | Actinobacteria           | Kocuria rosea strain DSM 20447                       | 99.78070175 | 1365/1368 |

**Table S2.**  $^1\text{H}$  and  $^{13}\text{C}$  NMR (250 and 63 MHz, respectively;  $\text{CDCl}_3$ ) data of **1-6**

| Position            | <b>1</b>            |                                         | <b>2</b>            |                                         | <b>3</b>            |                                         | <b>4</b>            |                                         | <b>5</b>            |                                         | <b>6</b>            |                                         |
|---------------------|---------------------|-----------------------------------------|---------------------|-----------------------------------------|---------------------|-----------------------------------------|---------------------|-----------------------------------------|---------------------|-----------------------------------------|---------------------|-----------------------------------------|
|                     | $\delta_{\text{C}}$ | $\delta_{\text{H}}$ (m, <i>J</i> in Hz) | $\delta_{\text{C}}$ | $\delta_{\text{H}}$ (m, <i>J</i> in Hz) | $\delta_{\text{C}}$ | $\delta_{\text{H}}$ (m, <i>J</i> in Hz) | $\delta_{\text{C}}$ | $\delta_{\text{H}}$ (m, <i>J</i> in Hz) | $\delta_{\text{C}}$ | $\delta_{\text{H}}$ (m, <i>J</i> in Hz) | $\delta_{\text{C}}$ | $\delta_{\text{H}}$ (m, <i>J</i> in Hz) |
| 2                   | 154.9               |                                         | 160.5               |                                         | 158.6               |                                         | 159.1               |                                         | 159.6               |                                         | 161.4               |                                         |
| 3                   | 105.0               | 8.13 (s)                                | 102.8               | 8.01 (s)                                | 105.8               | 8.19 (s)                                | 99.9                | 8.09 (s)                                | 104.5               | 8.06 (s)                                | 106.7               | 8.31 (s)                                |
| 4                   | 168.4               |                                         | 167.3               |                                         | 167.2               |                                         | 160.6               |                                         | 166.0               |                                         | 164.8               |                                         |
| 4-OCH <sub>3</sub>  | 56.9                | 4.16 (s)                                | 56.5                | 4.12 (s)                                | 56.8                | 4.14 (s)                                | 56.4                | 4.19 (s)                                | 56.7                | 4.11 (s)                                | 57.2                | 4.17 (s)                                |
| 5                   | 121.1               |                                         | 117.7               |                                         | 127.4               |                                         | 136.3               |                                         | 127.1               |                                         | 131.9               |                                         |
| 5-SCH <sub>3</sub>  | 18.5                | 2.42 (s)                                | 17.6                | 2.36 (s)                                | 18.1                | 2.54 (s)                                |                     |                                         |                     |                                         |                     |                                         |
| 5-SOCH <sub>3</sub> |                     |                                         |                     |                                         |                     |                                         |                     |                                         | 39.0                | 3.04 (s)                                | 40.1                | 3.11 (s)                                |
| 6                   | 152.7               |                                         | 155.0               |                                         | 137.4               |                                         | 154.3               |                                         | 151.1               |                                         | 132.9               |                                         |
| 7                   | 140.4               | 8.70 (d, 0.5)                           | 62.6                | 4.93 (s)                                | 116.6               |                                         | 156.4               | 9.12 (s)                                | 147.2               | 8.76 (s)                                | 114.7               |                                         |
| 2'                  | 153.2               |                                         | 155.6               |                                         | 153.9               |                                         | 155.7               |                                         | 154.4               |                                         | 153.0               |                                         |
| 3'                  | 121.2               | 8.12<br>(ddd, 8.0, 1.0, 1.0)            | 121.3               | 8.44<br>(ddd, 8.0, 1.0, 1.0)            | 121.9               | 8.47<br>(ddd, 7.6, 4.8, 1.1)            | 121.7               | 8.55<br>(ddd, 8.0, 1.0, 1.0)            | 122.3               | 8.47 (d, 7.9)                           | 122.4               | 8.53<br>(ddd, 7.9, 1.0, 0.9)            |
| 4'                  | 137.7               | 7.87<br>(ddd, 8.0, 7.6, 1.7)            | 137.2               | 7.84<br>(ddd, 8.0, 7.6, 1.8)            | 137.4               | 7.85<br>(ddd, 7.9, 7.6, 1.8)            | 137.3               | 7.87<br>(ddd, 8.0, 7.6, 1.8)            | 137.5               | 7.84<br>(ddd, 7.9, 7.6, 1.4)            | 137.6               | 7.89<br>(ddd, 7.9, 7.6, 1.8)            |
| 5'                  | 125.1               | 7.40<br>(ddd, 7.6, 4.8, 1.0)            | 124.4               | 7.34<br>(ddd, 7.6, 4.8, 1.0)            | 125.0               | 7.38<br>(ddd, 7.9, 1.1, 0.9)            | 124.5               | 7.38<br>(ddd, 7.6, 4.8, 1.0)            | 125.0               | 7.35 (dd, 7.6, 4.8)                     | 125.7               | 7.43<br>(ddd, 7.6, 4.8, 1.0)            |
| 6'                  | 149.6               | 8.71<br>(ddd, 4.8, 1.7, 1.0)            | 149.3               | 8.68<br>(ddd, 4.8, 1.8, 1.0)            | 149.2               | 8.66<br>(ddd, 4.8, 1.8, 0.9)            | 149.2               | 8.70<br>(ddd, 4.8, 1.8, 1.0)            | 149.1               | 8.65 (d, 4.8)                           | 149.4               | 8.69<br>(ddd, 4.8, 1.8, 0.9)            |
| OH                  |                     |                                         |                     | 4.78 (brs)                              |                     |                                         |                     |                                         |                     | 11.2 (brs)                              |                     |                                         |

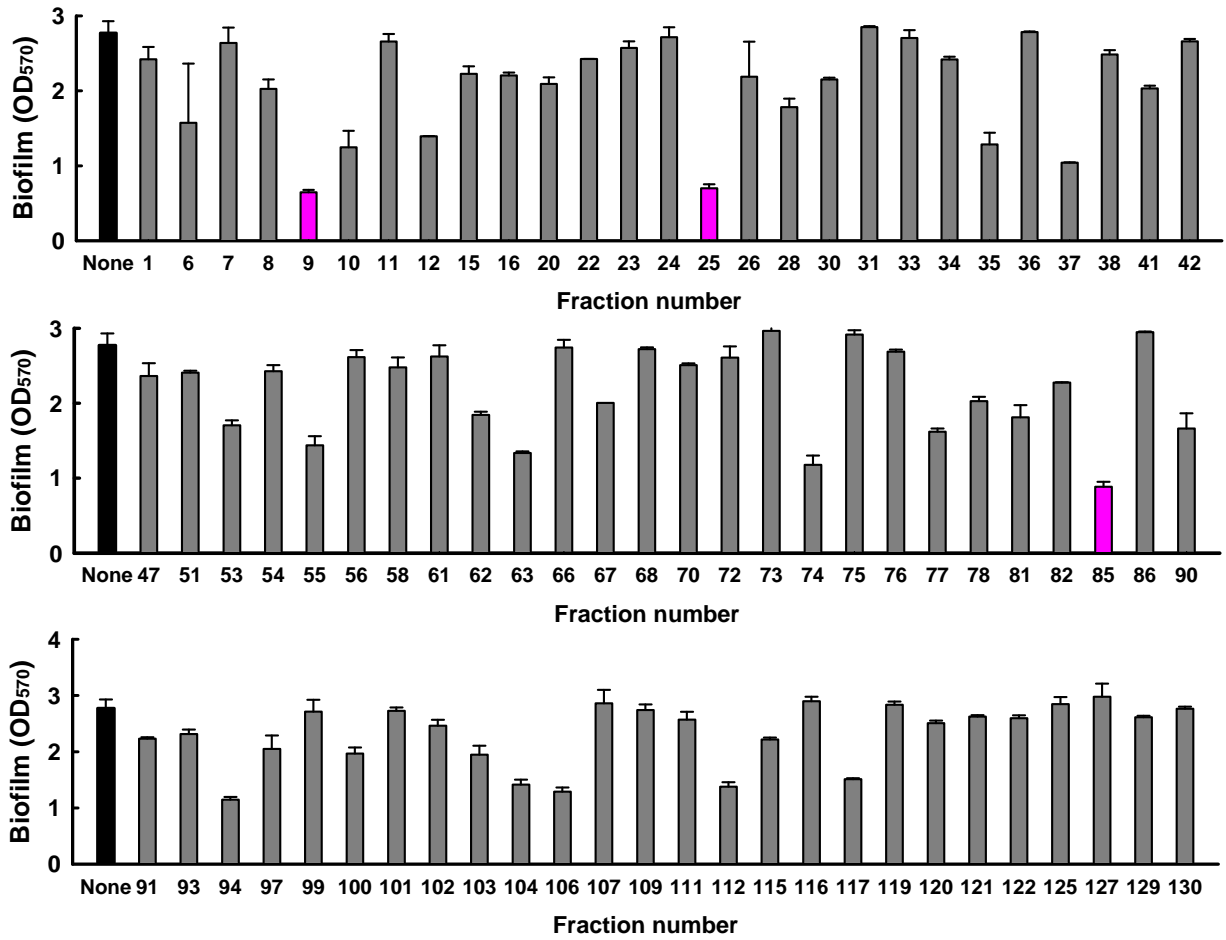

**Figure S1.** Antibiofilm activity screening of the extracts of 79 bacterial culture broth

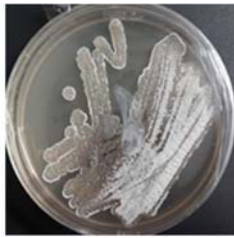

**Figure S2.** Plate image of *Streptomyces* sp. MC025



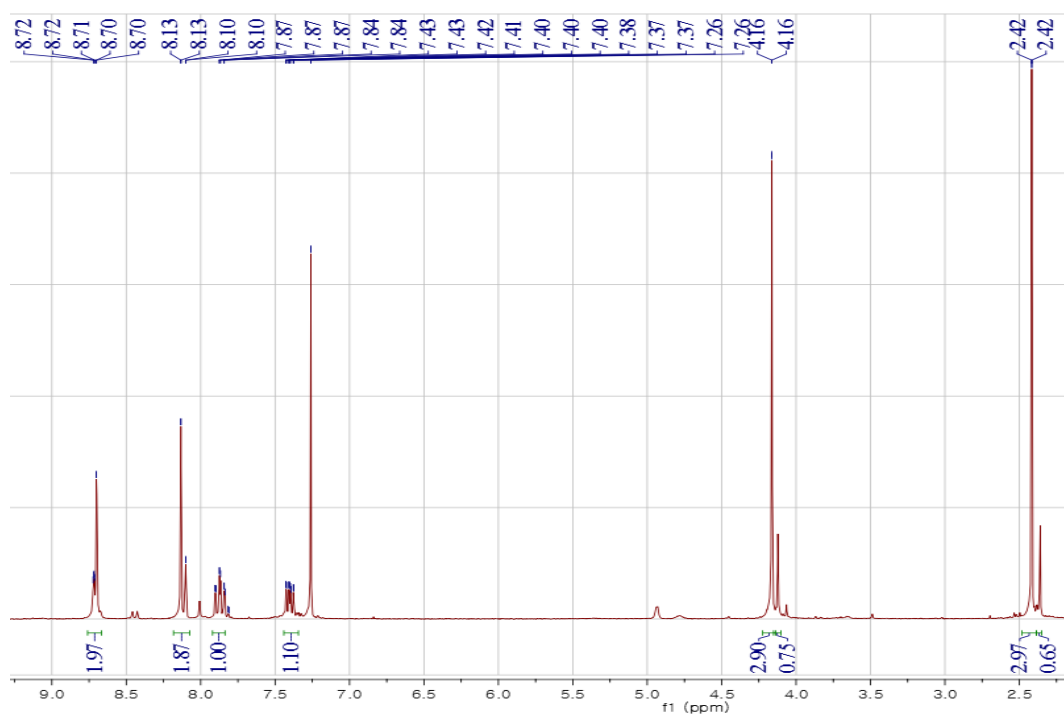

**Figure S3.**  $^1\text{H}$  NMR spectrum of compound 1 ( $\text{CDCl}_3$ , 250 MHz)

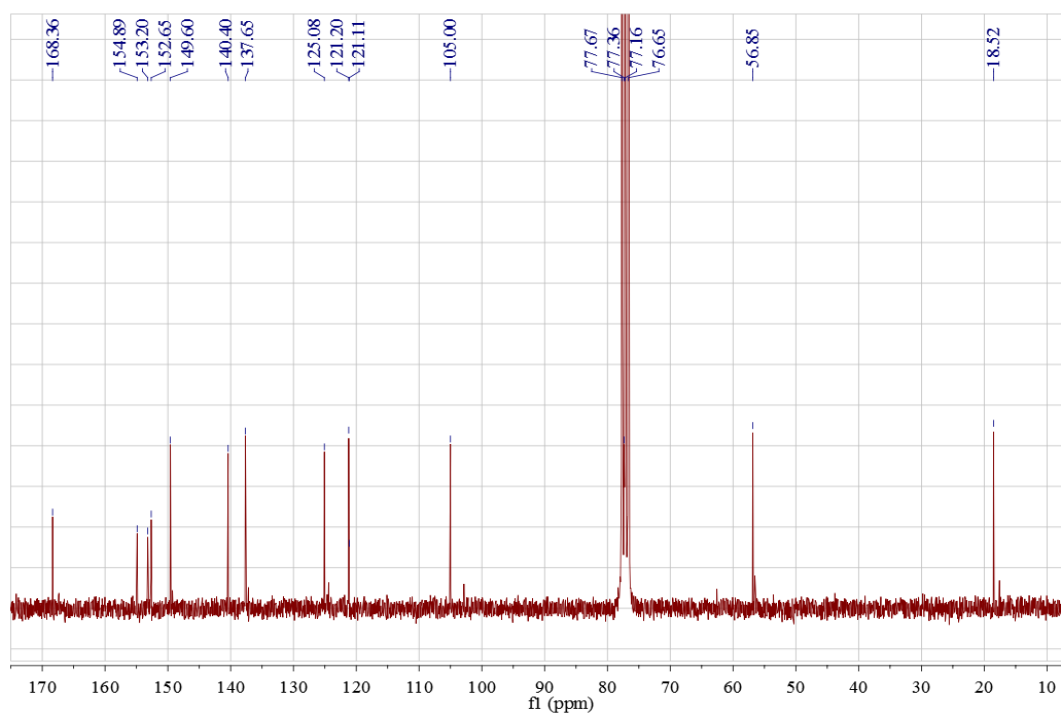

**Figure S4.**  $^{13}\text{C}$  NMR spectrum of compound **1** ( $\text{CDCl}_3$ , 63 MHz)

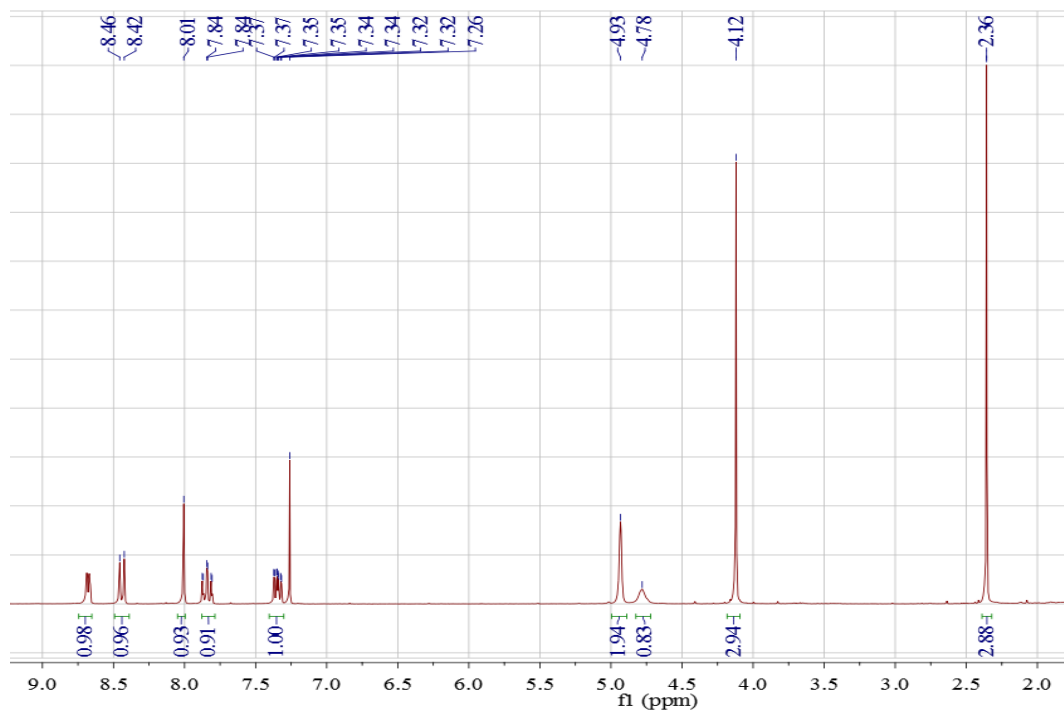

**Figure S5.**  $^1\text{H}$  NMR spectrum of compound **2** ( $\text{CDCl}_3$ , 250 MHz)

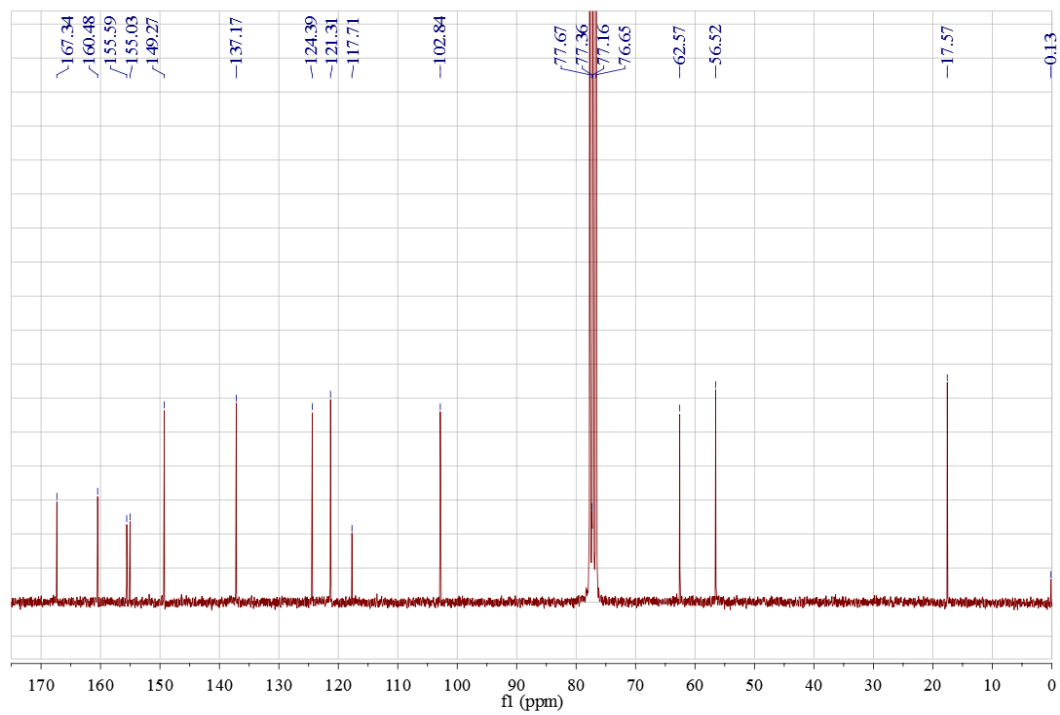

**Figure S6.**  $^{13}\text{C}$  NMR spectrum of compound **2** ( $\text{CDCl}_3$ , 63 MHz)

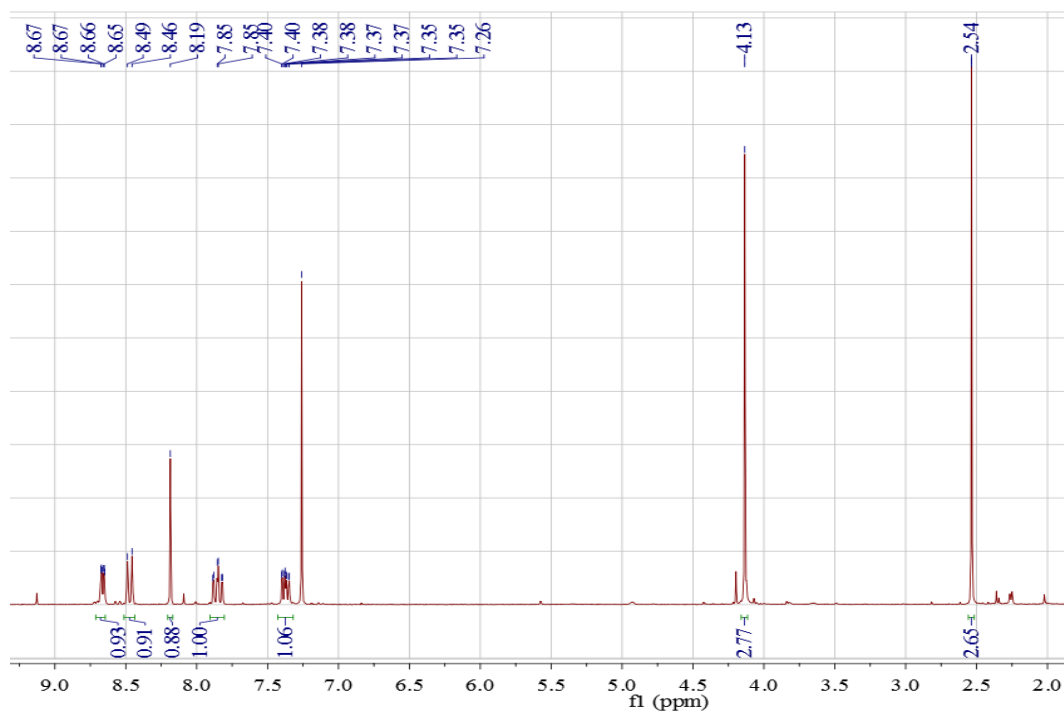

**Figure S7.**  $^1\text{H}$  NMR spectrum of compound **3** ( $\text{CDCl}_3$ , 250 MHz)

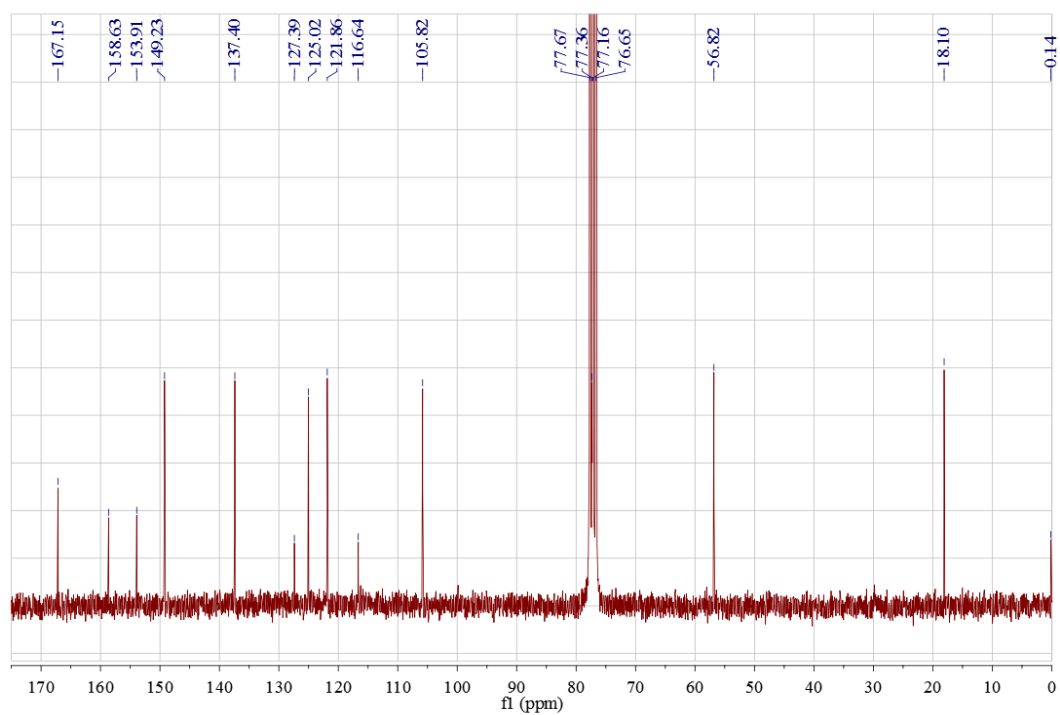

**Figure S8.**  $^{13}\text{C}$  NMR spectrum of compound **3** ( $\text{CDCl}_3$ , 63 MHz)

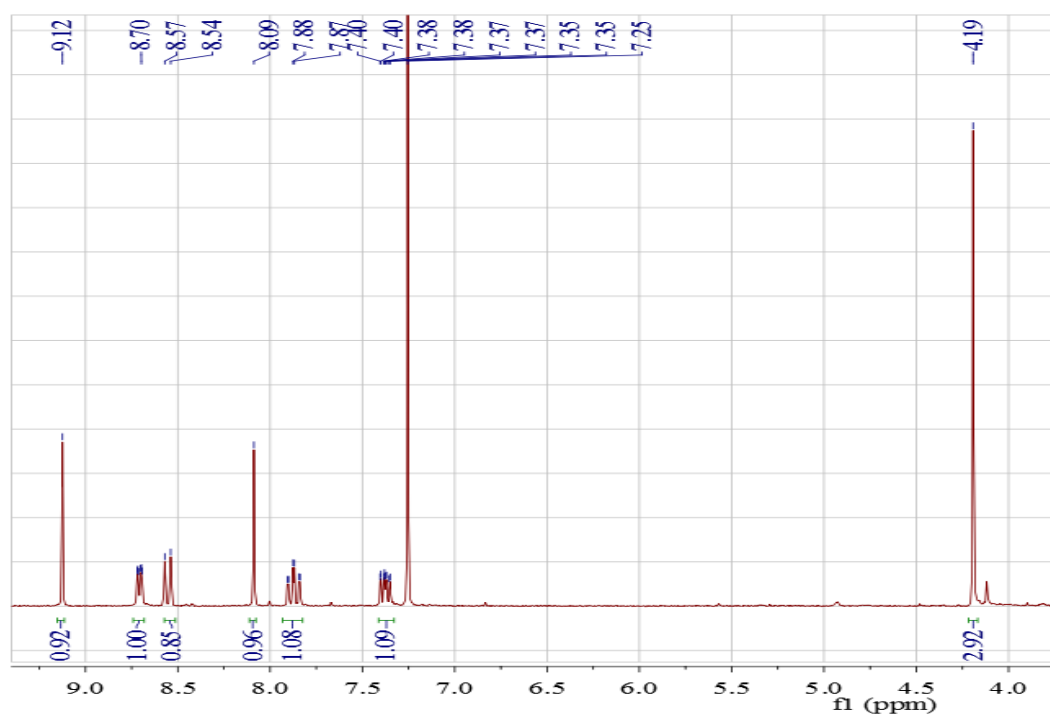

**Figure S9.**  $^1\text{H}$  NMR spectrum of compound 4 ( $\text{CDCl}_3$ , 250 MHz)

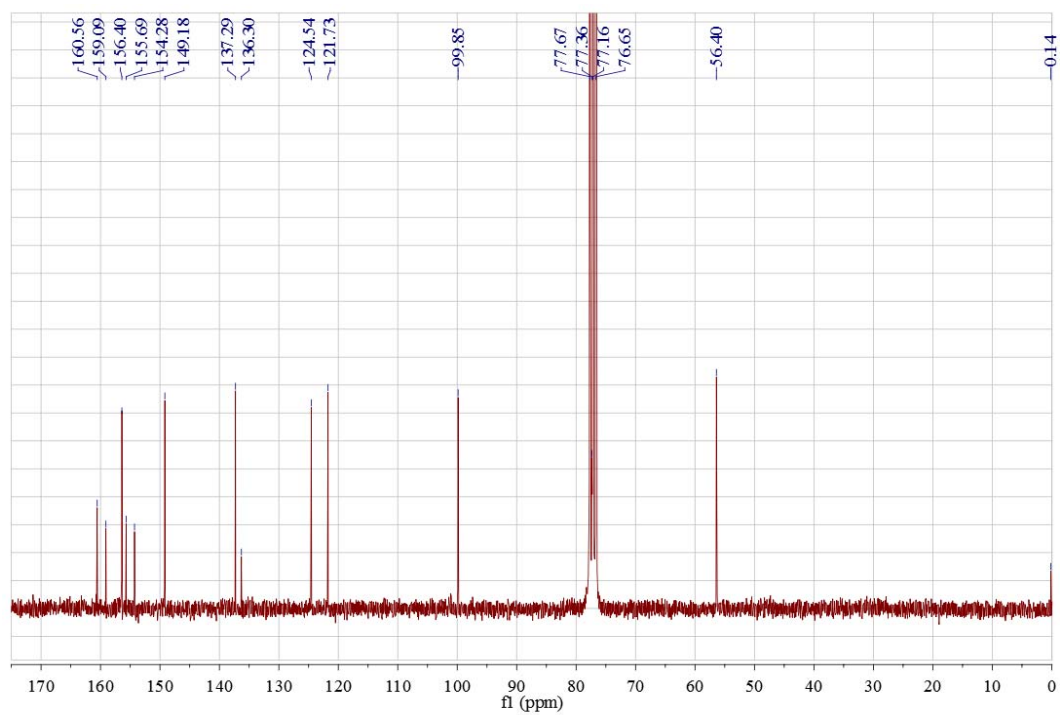

**Figure S10.**  $^{13}\text{C}$  NMR spectrum of compound **4** ( $\text{CDCl}_3$ , 63 MHz)



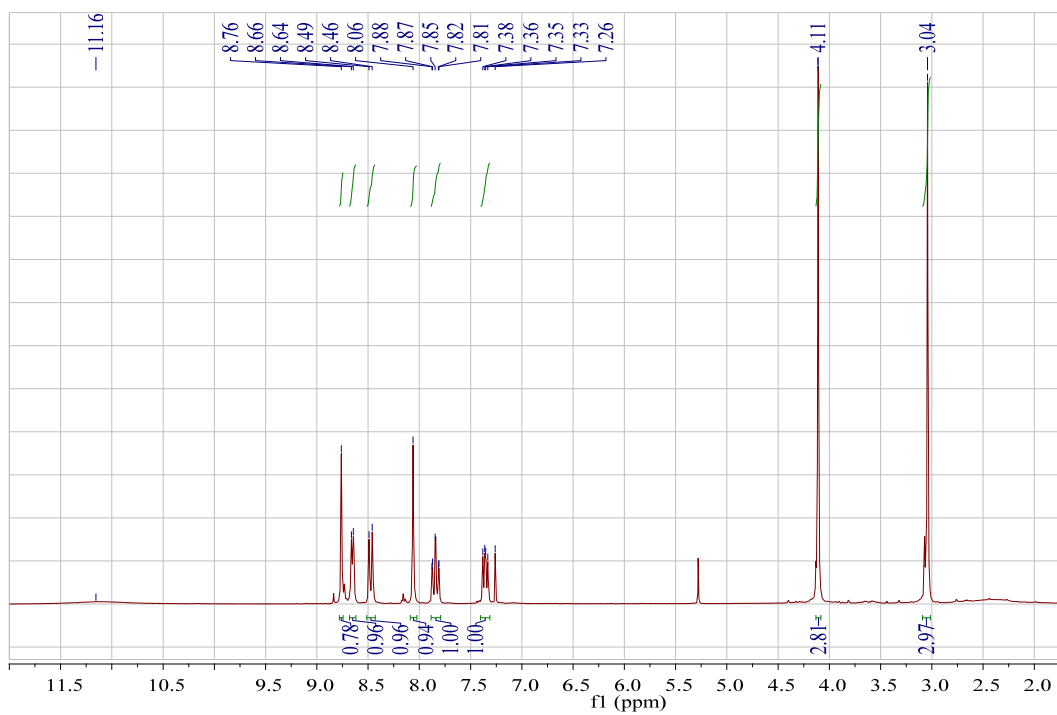

**Figure S11.**  $^1\text{H}$  NMR spectrum of compound **5** ( $\text{CDCl}_3$ , 250 MHz)

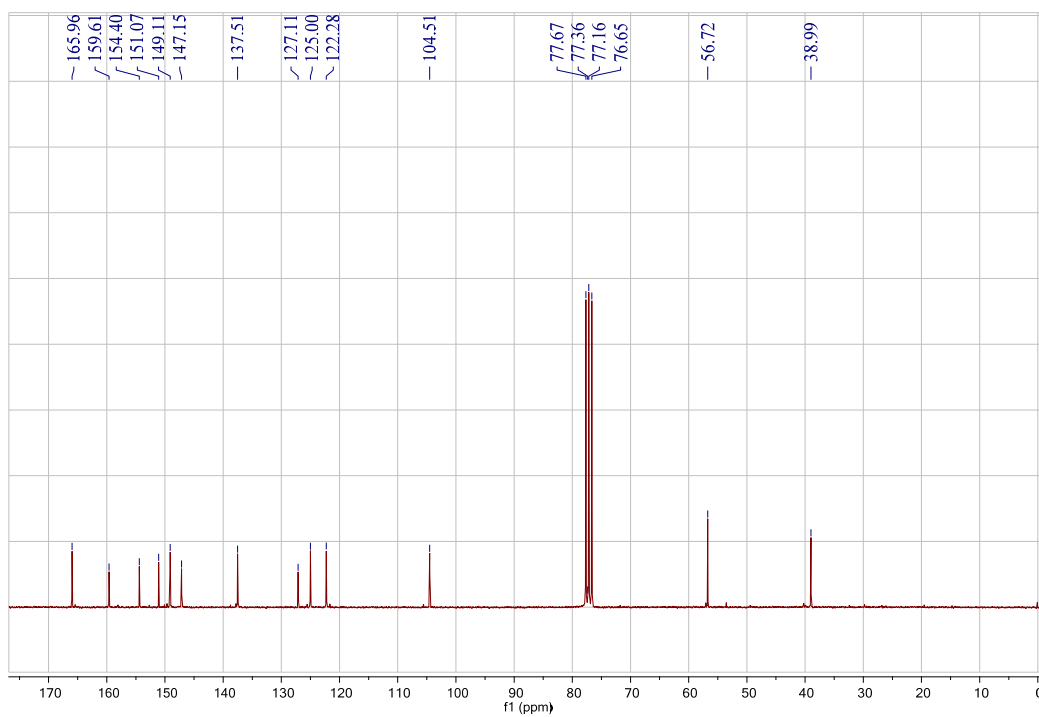

**Figure S12.**  $^{13}\text{C}$  NMR spectrum of compound 5 ( $\text{CDCl}_3$ , 63 MHz)

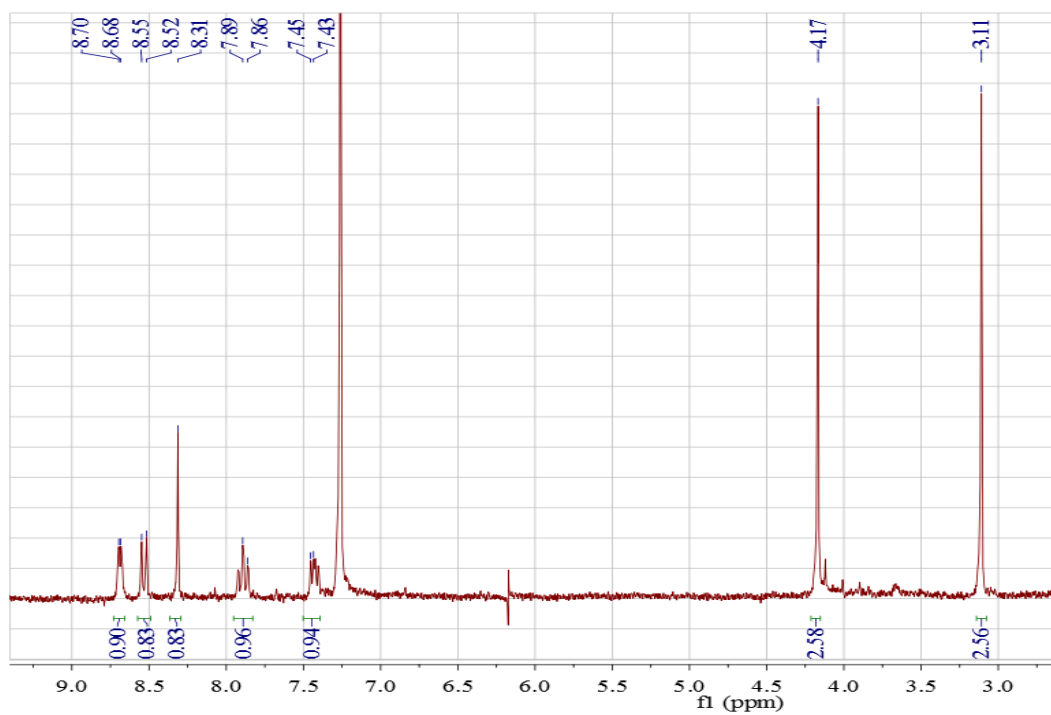

**Figure S13.**  $^1\text{H}$  NMR spectrum of compound **6** ( $\text{CDCl}_3$ , 250 MHz)

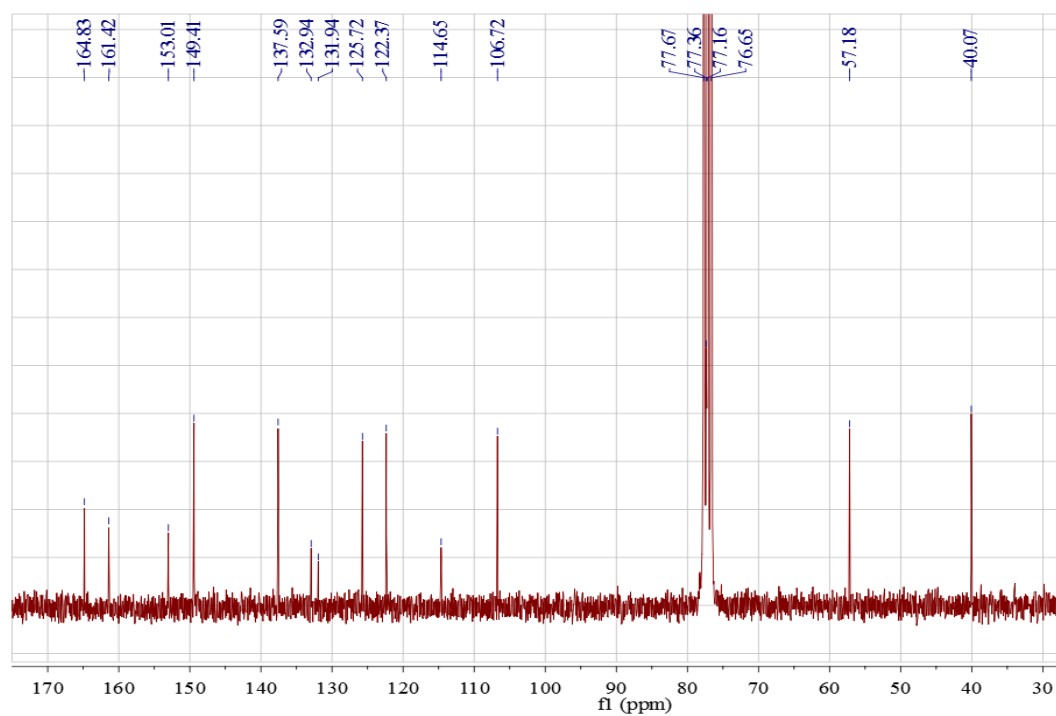

**Figure S14.**  $^{13}\text{C}$  NMR spectrum of compound **6** ( $\text{CDCl}_3$ , 63 MHz)
